# Supplementary material for: Mesothelin Gene Variants Affect Soluble Mesothelin-Related Protein Levels in the Plasma of Asbestos-Exposed Males and Mesothelioma Patients from Germany
Source: MDPI journal article supplement (doi:10.3390/biology11121826), 2022-12-14
Supplement: s1 [file s1]

Table S1. Logistic regression models in asbestos-exposed controls and mesothelioma (MM) groups adjusted by age.

| Model | Variable           | Effect               | OR           | 95% CI       |               | P value          | AIC    |
|-------|--------------------|----------------------|--------------|--------------|---------------|------------------|--------|
| 1     | Group              | Pre-diagnostic MM    | <b>7.98</b>  | <b>3.00</b>  | <b>21.20</b>  | <b>&lt;0.001</b> | 210.98 |
|       |                    | Manifest MM          | <b>12.70</b> | <b>5.36</b>  | <b>30.08</b>  | <b>&lt;0.001</b> |        |
|       |                    | Controls             | 1            |              |               |                  |        |
| 2     | Group              | Pre-diagnostic MM    | <b>8.07</b>  | <b>2.98</b>  | <b>21.82</b>  | <b>&lt;0.001</b> | 205.18 |
|       |                    | Manifest MM          | <b>17.38</b> | <b>6.88</b>  | <b>43.91</b>  | <b>&lt;0.001</b> |        |
|       |                    | Controls             | 1            |              |               |                  |        |
|       | MSLN rs3764247 A>C | Non-common genotype  | <b>3.12</b>  | <b>1.38</b>  | <b>7.08</b>   | <b>0.006</b>     |        |
|       |                    | Common genotype (AA) | 1            |              |               |                  |        |
| 3     | Group              | Pre-diagnostic MM    | <b>7.98</b>  | <b>2.98</b>  | <b>21.40</b>  | <b>&lt;0.001</b> | 209.46 |
|       |                    | Manifest MM          | <b>15.30</b> | <b>6.21</b>  | <b>37.67</b>  | <b>&lt;0.001</b> |        |
|       |                    | Controls             | 1            |              |               |                  |        |
|       | MSLN rs3764246 A>G | Non-common genotype  | 2.12         | 0.96         | 4.70          | 0.063            |        |
|       |                    | Common genotype (AA) | 1            |              |               |                  |        |
| 4     | Group              | Pre-diagnostic MM    | <b>8.29</b>  | <b>3.00</b>  | <b>22.92</b>  | <b>&lt;0.001</b> | 201.68 |
|       |                    | Manifest MM          | <b>25.78</b> | <b>8.96</b>  | <b>74.24</b>  | <b>&lt;0.001</b> |        |
|       |                    | Controls             | 1            |              |               |                  |        |
|       | MSLN rs2235503 C>A | Non-common genotype  | <b>4.77</b>  | <b>1.84</b>  | <b>12.36</b>  | <b>0.001</b>     |        |
|       |                    | Common genotype (CC) | 1            |              |               |                  |        |
| 5     | Group              | Pre-diagnostic MM    | <b>8.78</b>  | <b>3.14</b>  | <b>24.60</b>  | <b>&lt;0.001</b> | 200.77 |
|       |                    | Manifest MM          | <b>30.99</b> | <b>10.19</b> | <b>94.27</b>  | <b>&lt;0.001</b> |        |
|       |                    | Controls             | 1            |              |               |                  |        |
|       | Haplotype*         | 3 mutations          | <b>4.86</b>  | <b>1.73</b>  | <b>13.66</b>  | <b>0.003</b>     |        |
|       |                    | 1-2 mutations        | 0.56         | 0.18         | 1.77          | 0.325            |        |
|       |                    | No mutation          | 1            |              |               |                  |        |
| 6     | Group              | Pre-diagnostic MM    | <b>7.80</b>  | <b>2.87</b>  | <b>21.20</b>  | <b>&lt;0.001</b> | 204.33 |
|       |                    | Manifest MM          | <b>20.46</b> | <b>7.72</b>  | <b>54.21</b>  | <b>&lt;0.001</b> |        |
|       |                    | Controls             | 1            |              |               |                  |        |
|       | MSLN rs1057147 G>A | Non-common genotype  | <b>3.51</b>  | <b>1.48</b>  | <b>8.30</b>   | <b>0.004</b>     |        |
|       |                    | Common genotype (GG) | 1            |              |               |                  |        |
| 7     | Group              | Pre-diagnostic MM    | <b>10.65</b> | <b>3.42</b>  | <b>33.16</b>  | <b>&lt;0.001</b> | 203.42 |
|       |                    | Manifest MM          | <b>35.09</b> | <b>11.06</b> | <b>111.29</b> | <b>&lt;0.001</b> |        |
|       |                    | Controls             | 1            |              |               |                  |        |
|       | MSLN rs3764247 A>C | <b>AC</b> vs. AA     | 1.28         | 0.35         | 4.73          | 0.707            |        |
|       |                    | <b>CC</b> vs. AA     | 1.30         | 0.18         | 9.40          | 0.794            |        |
|       | MSLN rs3764246 A>G | <b>AG</b> vs. AA     | 0.65         | 0.18         | 2.32          | 0.504            |        |
|       |                    | <b>GG</b> vs. AA     | 0.97         | 0.07         | 12.96         | 0.980            |        |
|       | MSLN rs2235503 C>A | <b>CA</b> vs. CC     | 2.27         | 0.37         | 14.02         | 0.378            |        |
|       |                    | <b>AA</b> vs. CC     | 17.03        | 0.82         | 355.39        | 0.067            |        |
|       | MSLN rs1057147 G>A | <b>GA</b> vs. GG     | 2.04         | 0.65         | 6.35          | 0.221            |        |
|       |                    | <b>AA</b> vs. GG     | 1.33         | 0.25         | 7.11          | 0.742            |        |

| Model | Variable  | Effect               | OR           | 95% CI       |               | P value          | AIC    |
|-------|-----------|----------------------|--------------|--------------|---------------|------------------|--------|
| 8     | Group     | Pre-diagnostic MM    | <b>9.11</b>  | <b>3.13</b>  | <b>26.48</b>  | <b>&lt;0.001</b> | 200.06 |
|       |           | Manifest MM          | <b>39.38</b> | <b>11.57</b> | <b>134.02</b> | <b>&lt;0.001</b> |        |
|       |           | Controls             |              |              |               |                  |        |
|       | Mutations | 1 vs. no mutations   | 0.40         | 0.10         | 1.64          | 0.205            |        |
|       |           | 2 vs. no mutations   | 2.36         | 0.45         | 12.25         | 0.308            |        |
|       |           | 3 vs. no mutations   | 0.88         | 0.16         | 4.83          | 0.886            |        |
|       |           | 4 vs. no mutations   | <b>5.56</b>  | <b>1.51</b>  | <b>20.38</b>  | <b>0.010</b>     |        |
|       |           | 5-8 vs. no mutations | <b>9.78</b>  | <b>2.61</b>  | <b>36.62</b>  | <b>0.001</b>     |        |

OR Odds ratio; CI Confidence interval; AIC Akaike Information Criterion

\*Haplotype of the three SNPs from 5'-UTR with no mutation (AAC), 1-2 mutations (AGC, AAA, CAC, AGA, CAA, CGC), 3 mutations (CGA)
